# Supplementary material
Source: PubMed Central journal article supplement (PMC6556149)
Supplement: NIHMS1027704-supplement-supplement.pdf [file NIHMS1027704-supplement-supplement.pdf]

Supplemental Table 1. Significant whole-brain results from the EFAT task for angry and fearful faces.

| Mask/Emotion                       | Region                        | BA | MNI |     |      | Peak Z | Cluster k<br>mm <sup>3</sup> |
|------------------------------------|-------------------------------|----|-----|-----|------|--------|------------------------------|
|                                    |                               |    | x   | y   | z    |        |                              |
| <b><u>Positive HDRS Change</u></b> |                               |    |     |     |      |        |                              |
| <i>Anger</i>                       | Superior Frontal              | 9  | 10  | 56  | 36   | 2.98   | 41                           |
|                                    |                               | 11 | 14  | 52  | -12  | 3.61   | 121                          |
|                                    |                               | 46 | 36  | 50  | 26   | 2.85   | 20                           |
|                                    | Middle Frontal                | 9  | -4  | 50  | 36   | 2.92   | 40                           |
|                                    |                               | 48 | 28  | 26  | 30   | 3.81   | 66                           |
|                                    |                               | 46 | -38 | 32  | 30   | 3.42   | 168                          |
|                                    | Medial Frontal                | 47 | -26 | 40  | 12   | 3.72   | 29                           |
|                                    | Inferior Frontal              | 6  | -18 | -2  | 48   | 2.94   | 21                           |
|                                    |                               | 45 | 56  | 28  | 2    | 3.94   | 167                          |
|                                    |                               | 6  | 56  | 4   | 26   | 2.98   | 67                           |
|                                    | Orbital Frontal               | 48 | -36 | 26  | 14   | 3.33   | 232                          |
|                                    |                               | 11 | 2   | 44  | -16  | 2.94   | 144                          |
|                                    |                               | 47 | -32 | 22  | -26  | 3.23   | 16                           |
|                                    | Gyrus Rectus                  | 11 | 10  | 26  | -18  | 3.03   | 102                          |
|                                    | Precentral                    | 6  | -44 | 0   | 50   | 3.01   | 31                           |
|                                    | Postcentral                   | 22 | -64 | -18 | 16   | 3.06   | 18                           |
|                                    | Anterior Cingulate            | 24 | 8   | 0   | 30   | 3.14   | 25                           |
|                                    |                               | 24 | -8  | 2   | 34   | 3.01   | 31                           |
|                                    | Superior Temporal             | 22 | -54 | -8  | -8   | 3.78   | 476                          |
|                                    |                               | 42 | -62 | -28 | 16   | 3.65   | 145                          |
|                                    | Middle Temporal               | 39 | 48  | -76 | 20   | 3.12   | 67                           |
|                                    | Inferior Temporal             | 21 | 60  | -8  | -28  | 3.92   | 1394                         |
|                                    | Insula                        | 20 | -38 | -20 | -8   | 3.06   | 17                           |
|                                    | Uncus                         | 20 | 24  | -10 | -38  | 3.59   | 32                           |
|                                    | Inferior Parietal / Precuneus | 7  | -18 | -64 | 64   | 4.93   | 11227                        |
|                                    |                               |    | 0   | -48 | 10   | 3.38   | 77                           |
|                                    |                               | 19 | 24  | -60 | 26   | 3.30   | 32                           |
|                                    | Caudate                       | 25 | 12  | 24  | 10   | 4.02   | 50                           |
|                                    | Fusiform                      | 20 | -30 | -14 | -40  | 3.06   | 43                           |
|                                    | Fusiform / Hippocampus        | 20 | -36 | -36 | -20  | 5.52   | 1134                         |
|                                    | Parahippocampal               | 20 | 26  | -20 | -12  | 2.96   | 18                           |
|                                    | Inferior Occipital            | 18 | 20  | -92 | -16  | 3.93   | 146                          |
|                                    | Cerebellum                    |    | 8   | -2  | -18  | 3.96   | 22                           |
| Cerebellum, Declive                |                               | 44 | -56 | -26 | 4.19 | 648    |                              |
| <i>Fear</i>                        | Precentral                    | 43 | 60  | -6  | 24   | 3.11   | 45                           |
|                                    |                               | 4  | -48 | -8  | 28   | 3.97   | 117                          |
|                                    | Fusiform                      | 30 | -22 | -24 | -28  | 4.57   | 28                           |
|                                    | Middle Occipital              | 37 | 36  | -66 | 2    | 3.02   | 15                           |
|                                    | Cerebellum, Vermis            |    | -2  | -42 | -36  | 2.81   | 17                           |

**Negative HDRS Change**

|              |                   |    |     |     |     |      |     |
|--------------|-------------------|----|-----|-----|-----|------|-----|
| <i>Anger</i> | Medial Frontal    | 11 | 8   | 62  | -8  | 3.98 | 28  |
|              | Rostral Cingulate | 11 | 4   | 34  | -2  | 2.89 | 24  |
| <i>Fear</i>  | Superior Frontal  | 6  | 18  | -2  | 70  | 3.37 | 79  |
|              |                   | 11 | 28  | 50  | -18 | 3.18 | 43  |
|              | Middle Frontal    | 6  | -44 | 4   | 50  | 3.83 | 53  |
|              |                   | 8  | 30  | 12  | 58  | 3.18 | 22  |
|              | Inferior Frontal  | 6  | 54  | 10  | 18  | 3.75 | 214 |
|              |                   | 38 | 46  | 24  | -18 | 2.96 | 18  |
|              | Superior Temporal | 22 | 54  | -48 | 18  | 3.35 | 53  |
|              | Superior Parietal | 7  | 14  | -62 | 66  | 3.60 | 96  |
|              | Inferior Parietal | 39 | -42 | -60 | 46  | 3.00 | 108 |
|              | Supramarginal     | 40 | 50  | -40 | 38  | 3.38 | 74  |
|              | Paracentral       | 4  | 10  | -40 | 66  | 2.98 | 18  |
|              | Precuneus         |    | -12 | -70 | 32  | 3.87 | 56  |
|              | Fusiform          | 20 | 42  | -26 | -26 | 3.10 | 35  |
|              | Subcallosal       |    | 4   | 6   | -16 | 3.36 | 352 |
|              | Cerebellum, Tuber |    | 44  | -54 | -36 | 3.07 | 21  |

*Note.* Significant clusters were found at a  $p < .005$ ,  $k > 15$  contiguous cluster threshold, for a resulting minimum effect size to avoid Type II error.

Supplemental Table 2. Significant whole-brain results for Reward Anticipation.

| Region                             | BA | <u>MNI</u> |     |     | Peak Z | Cluster k |
|------------------------------------|----|------------|-----|-----|--------|-----------|
|                                    |    | x          | y   | z   |        |           |
| <b><u>Positive HDRS Change</u></b> |    |            |     |     |        |           |
| Superior Frontal                   | 6  | 10         | 14  | 60  | 3.6    | 37        |
| Medial Frontal                     | 9  | -12        | 50  | 32  | 3.44   | 196       |
|                                    | 10 | -14        | 58  | 14  | 3.32   | 33        |
|                                    | 9  | 6          | 52  | 24  | 2.85   | 36        |
| Ventral Medial Frontal             | 10 | -10        | 56  | -6  | 3.54   | 88        |
| Inferior Frontal                   | 45 | 56         | 26  | 18  | 2.94   | 19        |
| Rostral Cingulate                  | 24 | -2         | 32  | 10  | 3.45   | 46        |
| Posterior Cingulate                | 30 | -12        | -60 | 22  | 3.57   | 42        |
| Middle Temporal                    | 38 | 42         | 8   | -32 | 3.39   | 27        |
| Pulvinar                           |    | -14        | -20 | 2   | 3.34   | 21        |
| Putamen                            |    | -22        | -4  | 18  | 3.1    | 25        |
| <b><u>Negative HDRS Change</u></b> |    |            |     |     |        |           |
| Ventral Medial Frontal             | 11 | 14         | 32  | -22 | 3.44   | 28        |

*Note.* Significant clusters were found at a  $p < .005$ ,  $k > 15$  contiguous cluster threshold, for a resulting minimum effect size to avoid Type II error. N/A regions = 1.

Supplemental Table 3. Significant whole-brain results from the PGNG Task, including Commission Errors and Correct Rejections.

| Contrast                           | Region             | BA | MNI |      |     | Peak Z | Cluster k |
|------------------------------------|--------------------|----|-----|------|-----|--------|-----------|
|                                    |                    |    | x   | y    | z   |        |           |
| <b><u>Positive HDRS Change</u></b> |                    |    |     |      |     |        |           |
| <i>Comissions</i>                  | Middle Occipital   | 19 | 46  | -80  | 14  | 3.24   | 19        |
| <i>Rejections</i>                  | Middle Frontal     | 10 | -36 | 46   | 24  | 3.43   | 62        |
|                                    | Cuneus             | 18 | -10 | -102 | -6  | 4.26   | 20        |
| <b><u>Negative HDRS Change</u></b> |                    |    |     |      |     |        |           |
| <i>Comissions</i>                  | Medial Frontal     | 11 | 6   | 34   | -12 | 3.04   | 25        |
|                                    |                    | 25 | -4  | 8    | -18 | 3.31   | 18        |
|                                    | Precentral         | 6  | 50  | -2   | 10  | 2.97   | 27        |
|                                    | Insula             | 13 | 38  | 32   | 4   | 3.42   | 41        |
|                                    | Middle Temporal    | 37 | -50 | -38  | -16 | 3.29   | 45        |
|                                    | Caudate            |    | -12 | -10  | 28  | 3.11   | 34        |
|                                    | Putamen            |    | 24  | 18   | 6   | 3.17   | 25        |
|                                    | Globus Pallidus    |    | 18  | -12  | -4  | 3.05   | 20        |
|                                    | Red Nucleus        |    | -6  | -18  | -10 | 2.83   | 16        |
|                                    | Midbrain           |    | -2  | -34  | -12 | 3.25   | 34        |
| <i>Rejections</i>                  | Orbital frontal    | 25 | -14 | 6    | -20 | 3.1    | 17        |
|                                    | Inferior frontal   | 47 | 42  | 30   | -14 | 3.51   | 177       |
|                                    |                    | 47 | -44 | 32   | -16 | 3.85   | 214       |
|                                    | Anterior Cingulate | 32 | 16  | 48   | 0   | 2.95   | 32        |
|                                    | Inferior Parietal  | 40 | -46 | -44  | 22  | 3.22   | 28        |
|                                    | Superior Temporal  | 22 | 64  | -34  | 8   | 3.19   | 68        |
|                                    |                    | 38 | 58  | 10   | -14 | 3.75   | 28        |
|                                    |                    | 22 | 38  | -56  | 14  | 3.04   | 19        |
|                                    |                    | 38 | -34 | 6    | -22 | 3.12   | 21        |
|                                    |                    | 21 | -54 | -8   | -4  | 2.85   | 17        |
|                                    | Middle Temporal    | 21 | -46 | -34  | -2  | 3.48   | 87        |
|                                    |                    | 22 | -50 | -22  | -8  | 3      | 31        |
|                                    | Parahippocampal    | 36 | 30  | -44  | -4  | 3.24   | 47        |
|                                    |                    | 34 | -20 | -8   | -16 | 2.98   | 26        |
|                                    | Insula             | 13 | 40  | -12  | 22  | 2.81   | 17        |
|                                    |                    | 13 | -36 | -4   | -8  | 2.92   | 24        |
|                                    | Insula/ Putamen    |    | 28  | 8    | 8   | 3.71   | 103       |
|                                    | Putamen            |    | 32  | 4    | -10 | 3.24   | 63        |
|                                    | Hippocampal        |    | -30 | -32  | -4  | 3.48   | 35        |
|                                    | Amygdala           |    | -20 | -8   | -10 | 3.78   | 24        |

|           |     |     |     |      |    |
|-----------|-----|-----|-----|------|----|
| Caudate   | 12  | 20  | 6   | 3.08 | 38 |
|           | 14  | -6  | 26  | 3.27 | 42 |
|           | -10 | 18  | 8   | 3.85 | 20 |
| Thalamus  | -8  | -12 | 24  | 4.19 | 88 |
| Pulvinar  | 14  | -24 | 16  | 3.44 | 84 |
| Calcarine | -24 | -74 | 6   | 3.16 | 37 |
| Midbrain  | -2  | -34 | -14 | 3.66 | 27 |

---

*Note.* Significant clusters were found at a  $p < .005$ ,  $k > 15$  contiguous cluster threshold, for a resulting minimum effect size to avoid Type II error. N/A regions = 3.

---

Supplemental Table 4. Significant whole-brain results from the Resting State Networks.

| Network-Seed                       | Region                       | BA               | MNI |      |     | Peak Z | Cluster k |
|------------------------------------|------------------------------|------------------|-----|------|-----|--------|-----------|
|                                    |                              |                  | x   | y    | z   |        |           |
| <b><u>Positive HDRS Change</u></b> |                              |                  |     |      |     |        |           |
| <i>CCN-Right<br/>DLPFC</i>         | Anterior Cingulate           | 32               | -4  | 44   | -2  | 4.03   | 130       |
|                                    | Superior Frontal             | 8                | 14  | 40   | 38  | 4.17   | 25        |
|                                    |                              | 10               | -26 | 62   | 8   | 3.77   | 147       |
|                                    |                              | 9                | -16 | 42   | 34  | 3.53   | 66        |
|                                    |                              | 9                | -48 | 20   | 36  | 3.49   | 73        |
|                                    |                              | 10               | -8  | 60   | 26  | 3.08   | 24        |
|                                    |                              | 9                | -6  | 28   | 36  | 3.52   | 24        |
|                                    | Medial Frontal               | 11               | -4  | 46   | -16 | 3.03   | 30        |
|                                    |                              | 45               | -52 | 34   | 0   | 3.61   | 19        |
|                                    | Precentral                   | 3                | 46  | -20  | 52  | 3.64   | 40        |
|                                    |                              | 6                | -48 | -2   | 30  | 3.34   | 81        |
|                                    |                              | 6                | -46 | -12  | 42  | 3.09   | 15        |
|                                    |                              | 7                | -28 | -54  | 46  | 3.83   | 74        |
|                                    | Superior Parietal            | 7                | -20 | -70  | 50  | 3.77   | 18        |
|                                    |                              | 19               | 22  | -58  | 48  | 3.07   | 31        |
|                                    | Posterior cingulate          | 30               | -8  | -56  | 12  | 3.85   | 163       |
|                                    |                              | 31               | -6  | -44  | 24  | 3.69   | 49        |
|                                    | Fusiform                     | 37               | -36 | -50  | -20 | 3.86   | 67        |
|                                    | Superior Temporal            | 42               | 70  | -20  | 10  | 3.92   | 50        |
|                                    | Middle Temporal              | 21               | 52  | -4   | -20 | 3.48   | 25        |
|                                    |                              | 22               | -34 | -58  | 22  | 3.08   | 23        |
|                                    | Cuneus                       | 17               | -20 | -100 | 0   | 4.41   | 173       |
|                                    |                              | 18               | -4  | -94  | 22  | 3.92   | 86        |
|                                    | Lingual                      | 18               | 24  | -94  | -10 | 4.23   | 88        |
|                                    | Middle Occipital             | 18               | -38 | -92  | -6  | 3.61   | 15        |
|                                    |                              | 18               | 22  | -102 | 10  | 3.54   | 41        |
|                                    | Inferior Occipital           | 19               | -30 | -92  | 4   | 3.07   | 15        |
|                                    | Medial Dorsal                |                  | -4  | -16  | 12  | 3.1    | 33        |
|                                    | Pulvinar                     |                  | -12 | -34  | 8   | 3.79   | 65        |
|                                    | Cerebellum Crus              |                  | 46  | -72  | -34 | 4.74   | 42        |
|                                    |                              |                  | 20  | -84  | -40 | 4.28   | 102       |
|                                    |                              |                  | -22 | -80  | -48 | 3.2    | 25        |
|                                    | <i>SEN-Left<br/>Amygdala</i> | Inferior Frontal | 9   | 44   | 2   | 30     | 3.42      |
| Inferior Parietal                  |                              | 7                | 36  | -52  | 58  | 3.32   | 19        |
| Superior Temporal                  |                              | 38               | -44 | 8    | -10 | 3.51   | 16        |

|                      |                           |    |     |      |     |      |      |
|----------------------|---------------------------|----|-----|------|-----|------|------|
|                      |                           | 38 | -32 | 12   | -44 | 3.27 | 16   |
|                      | Middle Temporal           | 37 | 62  | -68  | 8   | 3.26 | 16   |
|                      |                           | 37 | 48  | -66  | 2   | 3.21 | 17   |
|                      | Insula                    | 13 | -34 | -12  | 10  | 3.72 | 62   |
|                      | Lingual                   | 17 | 12  | -94  | -20 | 3.11 | 82   |
|                      | Midbrain                  |    | -14 | -22  | -16 | 3.85 | 16   |
|                      | Cerebellar Nodule         |    | -6  | -58  | -36 | 3.19 | 31   |
|                      | Cerebellar Tonsil         |    | 22  | -60  | -40 | 3.56 | 37   |
|                      | Cerebellar Tonsil         |    | -20 | -54  | -46 | 2.95 | 25   |
|                      |                           |    | 6   | -100 | -8  | 4.51 | 71   |
|                      |                           |    | 38  | -98  | 6   | 4.46 | 20   |
|                      | Cerebellar Tuber          |    | -42 | -84  | -38 | 3.22 | 20   |
| <i>SEN-Left SGAC</i> | Inferior Frontal          | 9  | 46  | -2   | 20  | 3.15 | 16   |
|                      | Inferior Parietal         | 7  | -52 | -60  | 54  | 3.13 | 19   |
|                      | Fusiform                  | 20 | -48 | -24  | -26 | 3.83 | 53   |
|                      |                           | 20 | -40 | -26  | -12 | 3.8  | 93   |
|                      | Lingual                   | 18 | -4  | -92  | -22 | 3.45 | 43   |
| <i>DMN-Left PCC</i>  | Superior Frontal          | 6  | -10 | 34   | 68  | 3.3  | 18   |
|                      |                           | 6  | 20  | 12   | 64  | 3.28 | 16   |
|                      |                           | 6  | -18 | 18   | 58  | 3.21 | 34   |
|                      | Middle Frontal            | 10 | -42 | 56   | 16  | 4.01 | 108  |
|                      |                           | 10 | 42  | 60   | 22  | 3.83 | 88   |
|                      |                           | 10 | 42  | 36   | 30  | 3.58 | 108  |
|                      | Inferior Frontal          | 45 | -50 | 28   | 12  | 3.45 | 65   |
|                      |                           | 10 | -54 | 50   | 4   | 3.3  | 21   |
|                      | Precentral                | 4  | 26  | -30  | 52  | 3.78 | 40   |
|                      |                           | 6  | 48  | -12  | 34  | 3.39 | 136  |
|                      |                           | 6  | 54  | -4   | 22  | 4.38 | 102  |
|                      | Dorsal Cingulate          | 32 | -16 | 6    | 42  | 3.71 | 40   |
|                      | Superior Parietal         | 7  | 18  | -60  | 68  | 3.07 | 15   |
|                      | Inferior Parietal         | 40 | 40  | -44  | 44  | 3.76 | 42   |
|                      |                           | 40 | -58 | -46  | 48  | 3.01 | 37   |
|                      | Paracentral/Precuneu<br>s | 5  | -8  | -42  | 60  | 4.51 | 1062 |
|                      | Precuneus                 | 31 | -14 | -64  | 28  | 3.16 | 50   |
|                      | Postcentral               | 43 | -60 | -10  | 18  | 3.44 | 151  |
|                      | Posterior Cingulate       | 31 | 18  | -36  | 44  | 3.48 | 16   |
|                      |                           | 31 | -18 | -36  | 44  | 3.16 | 19   |
|                      | Insula                    | 13 | -44 | 10   | 2   | 4.1  | 45   |
|                      | Superior Temporal         | 39 | 46  | -50  | 8   | 3.73 | 175  |
|                      |                           | 38 | -58 | 16   | -16 | 3.53 | 25   |

|                                    |                                |         |     |     |     |      |      |
|------------------------------------|--------------------------------|---------|-----|-----|-----|------|------|
|                                    | Middle Temporal                | 39      | -42 | -72 | 12  | 3.86 | 58   |
|                                    | Middle Occipital               | 19      | 62  | -68 | -10 | 3.17 | 35   |
|                                    | Cerebellum Crus                |         | -26 | -78 | -22 | 3.61 | 27   |
| <b><u>Negative HDRS Change</u></b> |                                |         |     |     |     |      |      |
| <i>CCN-rDLPFC</i>                  | Medial Frontal                 | 32      | 14  | 16  | 52  | 4.02 | 17   |
|                                    |                                | 6       | 14  | -8  | 58  | 2.91 | 16   |
|                                    | Middle Frontal                 | 8       | 30  | 38  | 50  | 4.16 | 29   |
|                                    |                                | 6       | 28  | 4   | 68  | 3.15 | 26   |
|                                    | Inferior Parietal              | 40      | 46  | -38 | 30  | 4.24 | 54   |
|                                    | Insula                         | 13      | 44  | 0   | 10  | 4.27 | 81   |
|                                    |                                | 13      | -34 | 4   | 10  | 3.33 | 16   |
|                                    | Putamen                        |         | 24  | 2   | 12  | 3.7  | 31   |
|                                    | Cerebellum Culmen              |         | 12  | -42 | -26 | 3.41 | 28   |
|                                    | Cerebellum Pyramis             |         | -28 | -70 | -38 | 3.96 | 16   |
| <i>SEN-Left Amygdala</i>           | Superior Frontal               | 11      | -8  | 56  | -28 | 3.36 | 17   |
|                                    | Middle Frontal                 | 10      | 42  | 50  | 8   | 4.16 | 38   |
|                                    |                                | 6       | 30  | -2  | 74  | 3.6  | 39   |
|                                    | Medial Frontal                 | 10      | 20  | 58  | 0   | 3.69 | 41   |
|                                    |                                | 6       | -8  | -10 | 62  | 3.48 | 43   |
|                                    |                                | 11      | 6   | 20  | -18 | 3.38 | 23   |
|                                    | Inferior Frontal               | 11      | -10 | 34  | -20 | 4.51 | 368  |
|                                    |                                | 47      | 30  | 18  | -16 | 4.34 | 324  |
|                                    |                                | 9       | 56  | 12  | 38  | 3.75 | 20   |
|                                    | Precentral                     | 6       | -64 | -8  | 38  | 3.8  | 18   |
|                                    |                                | 6       | 64  | 2   | 30  | 3.02 | 25   |
|                                    | Postcentral                    | 5       | -26 | -54 | 76  | 3.08 | 17   |
|                                    | Superior Parietal              | 7       | 20  | -66 | 50  | 3.46 | 33   |
|                                    | Superior Temporal              | 22      | -70 | -46 | 10  | 4.12 | 16   |
|                                    | Middle Temporal                | 20      | -52 | -28 | -18 | 3.27 | 23   |
|                                    |                                | 21      | -44 | -42 | -4  | 3.52 | 103  |
|                                    | Insula                         | 13      | 46  | -40 | 22  | 3.58 | 30   |
|                                    | Lingual                        | 18      | -8  | -88 | -16 | 3.91 | 49   |
|                                    |                                | 19      | -20 | -68 | -8  | 3.9  | 42   |
|                                    |                                | Putamen |     | 26  | 2   | 0    | 3.97 |
|                                    | Midbrain                       |         | 2   | -16 | -2  | 3.37 | 24   |
|                                    | Cerebellar Inferior Semi-Lunar |         | 44  | -82 | -46 | 3.12 | 30   |
| <i>SEN-Left SGAC</i>               | Superior Frontal               | 11      | -24 | 40  | -22 | 3.14 | 20   |
|                                    | Medial Frontal                 | 9       | 12  | 42  | 22  | 3.32 | 48   |
|                                    | Inferior Frontal               | 46      | 52  | 38  | 16  | 3.51 | 23   |
|                                    | Anterior Cingulate             | 24      | -2  | 36  | 2   | 3.7  | 197  |



|                     |                     |    |     |     |     |      |     |
|---------------------|---------------------|----|-----|-----|-----|------|-----|
|                     | Precuneus           | 7  | 6   | -62 | 30  | 3.58 | 219 |
|                     | Posterior Cingulate | 31 | 16  | -44 | 36  | 3.36 | 23  |
|                     | Superior Temporal   | 38 | -32 | 2   | -18 | 4.13 | 78  |
|                     | Middle Temporal     | 21 | -54 | -10 | -20 | 4.31 | 139 |
|                     |                     | 21 | 50  | -6  | -20 | 3.56 | 20  |
|                     | Fusiform            | 20 | 36  | -18 | -40 | 3.04 | 15  |
|                     | Cerebellar Culmen   |    | -30 | -36 | -30 | 4.23 | 24  |
| <i>DMN-Left PCC</i> | Middle Frontal      | 6  | 46  | 0   | 62  | 3.27 | 16  |
|                     | Inferior Frontal    | 47 | -24 | 14  | -20 | 3.83 | 24  |
|                     | Inferior Frontal    | 47 | 28  | 22  | -16 | 3.54 | 42  |
|                     | Anterior Cingulate  | 25 | -4  | 2   | -12 | 3.42 | 66  |
|                     | Inferior Parietal   | 40 | -46 | -38 | 62  | 4.47 | 77  |
|                     | Superior Temporal   | 38 | 38  | 14  | -34 | 4.14 | 46  |
|                     | Superior Temporal   | 38 | -34 | 14  | -34 | 3.97 | 52  |
|                     | Caudate             |    | -14 | 18  | -8  | 3.07 | 26  |
|                     | Caudate             |    | 12  | 8   | 0   | 2.97 | 37  |
|                     | Putamen             |    | 24  | -14 | 20  | 3.12 | 21  |
|                     | Lentiform Nucleus   |    | 24  | 8   | 14  | 3.51 | 40  |
|                     | Cerebellar Tonsil   |    | 36  | -32 | -40 | 3.73 | 29  |

---

*Note.* Significant clusters were found at a  $p < .005$ ,  $k > 15$  contiguous cluster threshold, for a resulting minimum effect size to avoid Type II error. CCN N/A Regions = 12; SEN Amygdala N/A Regions = 10; SEN SGAC N/A Regions = 1; DMN N/A Regions = 9.

---
